# Supplementary material
Source: ML conference proceedings conference paper supplement (https://openaccess.thecvf.com/content/CVPR2025/html/Sommer_Common3D_Self-Supervised_Learning_CVPR_2025_paper.html)
Supplement: Supplementary file 1 [file Sommer_Common3D_Self-Supervised_Learning_CVPR_2025_supplemental.pdf]

# Common3D: Self-Supervised Learning of 3D Morphable Models for Common Objects in Neural Feature Space

## Supplementary Material

| Name                        | Value                |
|-----------------------------|----------------------|
| Optimizer                   | Adam                 |
| Learning Rate               | 1.00E-04             |
| Batch Size                  | 12                   |
| Batch Accumulation          | 2                    |
| Losses                      |                      |
| $\lambda_{app}$             | 1.00E-01             |
| $\lambda_{CD}$              | 1.00E-01             |
| $\lambda_m$                 | 1.00E+00             |
| $\lambda_{mdt}$             | 1.00E+02             |
| $\lambda_{sdf}$             | 1.00E-02             |
| $\lambda_{def}$             | 1.00E-01             |
| $\lambda_{def-sm}$          | 1.00E-02             |
| $\kappa$                    | 14.3                 |
| Vertex Sampling             | 150                  |
| Mesh Model                  |                      |
| Tetrahedron Grid Size       | 16                   |
| Instance Shape Encoder      |                      |
| ResNet Blocks               | 4                    |
| ResNet Block Types          | bottleneck           |
| Out Dimensions              | [256, 256, 256, 256] |
| Strides                     | [2, 2, 2, 2]         |
| Pre-Upsampling              | [1, 1, 1]            |
| Affine Transformation Field |                      |
| Layers                      | 5                    |
| Hidden Dimension            | 256                  |
| Out Dimension               | 6                    |
| Feature Adapter             |                      |
| ResNet Blocks               | 4                    |
| ResNet Block Types          | bottleneck           |
| Out Dimensions              | [512, 512, 128]      |
| Strides                     | [1, 1, 1]            |
| Pre-Upsampling              | [1, 1, 2]            |
| SDF Field                   |                      |
| Layers                      | 5                    |
| Hidden Dimension            | 256                  |
| Out Dimension               | 1                    |
| Feature Field               |                      |
| Layers                      | 5                    |
| Hidden Dimension            | 256                  |
| Out Dimension               | 128                  |

Table 7. The following parameters are set for training and testing our model.

## 6. Parameters

In Tab. 7 we list our model’s parameters and their values.

We set  $\sigma$  as the average nearest neighbor distance for all vertices  $V$  to the sampled vertices  $V'$ , as follows

$$\sigma = \sqrt{\frac{1}{|V|} \sum_{v \in V} \min_{v' \in V'} \|v - v'\|^2}. \quad (14)$$

## 7. Comprehensive Results

We report all missing categorical quantitative results in Tabs. 8 to 10. Additional qualitative results are shown for ObjectNet3D in Fig. 4 and for SPair-71k in Fig. 6.

|        | Method       | bicycle     | bus         | car         | chair       | couch       | motorcycle  | tv          | AVG         |
|--------|--------------|-------------|-------------|-------------|-------------|-------------|-------------|-------------|-------------|
| Sup.   | StarMap [83] | 83.2        | 94.4        | 90          | 75.4        | 79.8        | 68.8        | 85.8        | 82.5        |
|        | VoGE [63]    | 82.6        | 98.1        | 99          | 90.5        | 94.9        | 87.5        | 83.9        | 90.9        |
| Unsup. | ZSP [14]     | 61.7        | 21.4        | 61.6        | 42.6        | 52.9        | 43.1        | 39          | 46          |
|        | UOP3D [52]   | 58.4        | 79.3        | 98.2        | 51.9        | 76.6        | 67          | <b>53.1</b> | 69.2        |
|        | Ours         | <b>67.2</b> | <b>82.9</b> | <b>99.3</b> | <b>67.8</b> | <b>80.9</b> | <b>78.1</b> | 51.1        | <b>75.3</b> |

Table 8. **Comprehensive Evaluation** object 3D pose on PASCAL3D+. We report the 30° accuracy for 7 categories.

|            | b’pack      | bench       | b’cycle     | bus         | car         | phone       | chair       | couch       | cup         | h’dryer     |             |
|------------|-------------|-------------|-------------|-------------|-------------|-------------|-------------|-------------|-------------|-------------|-------------|
| ZSP [14]   | 23.1        | 50.8        | 58.6        | 30.5        | 60.3        | 46.4        | 36.8        | 55.5        | 33          | <b>21.7</b> |             |
| UOP3D [52] | 18          | 62.1        | 57.8        | 78.3        | 98.1        | <b>54.6</b> | 52.2        | 76.6        | 38.2        | 14.1        |             |
| Ours       | <b>25.5</b> | <b>77</b>   | <b>65.7</b> | <b>81.1</b> | <b>99</b>   | 51.8        | <b>65.9</b> | <b>79</b>   | <b>44.7</b> | 19.4        |             |
|            | k’board     | laptop      | m’wave      | m’cycle     | mouse       | remote      | suitcase    | toaster     | toilet      | tv          | AVG         |
| ZSP [14]   | <b>46.8</b> | <b>60.5</b> | 50.5        | 50.3        | 28.8        | 41.6        | <b>25.8</b> | 28.8        | 56.3        | 37.9        | 42.2        |
| UOP3D [52] | 26.9        | 53.3        | <b>80.3</b> | 69          | <b>44.7</b> | <b>54.4</b> | 15.5        | <b>60.6</b> | 39.6        | <b>53.2</b> | 52.4        |
| Ours       | 34.5        | 54.2        | 76.1        | <b>81</b>   | 38.5        | 52.4        | 15.7        | 57.3        | <b>65</b>   | 52.4        | <b>56.8</b> |

Table 9. **Comprehensive evaluation** of object 3D pose on ObjectNet3D. We report the 30° accuracy for 20 categories.

|            | b’pack      | bench       | b’cycle     | bus         | car         | phone       | chair       | couch       | cup         | h’dryer     |           |
|------------|-------------|-------------|-------------|-------------|-------------|-------------|-------------|-------------|-------------|-------------|-----------|
| UOP3D [52] | 68.9        | 49.9        | 27.9        | <b>66.8</b> | 79.2        | 67.7        | 42.9        | 73          | <b>69.6</b> | 50.9        |           |
| Ours       | <b>69.4</b> | <b>54.1</b> | <b>31.5</b> | 64.9        | <b>82.8</b> | <b>68.1</b> | <b>53.3</b> | <b>77.8</b> | 66.8        | <b>53.6</b> |           |
|            | k’board     | laptop      | m’wave      | m’cycle     | mouse       | remote      | suitcase    | toaster     | toilet      | tv          | AVG       |
| UOP3D [52] | 76.9        | 62.4        | <b>75.3</b> | 64.3        | <b>64.1</b> | 61.4        | 62.5        | 77.9        | 64.7        | 73.8        | 64        |
| Ours       | <b>83.1</b> | <b>70.6</b> | 75.2        | <b>66.7</b> | 62.7        | <b>71.7</b> | <b>65.3</b> | <b>78.2</b> | <b>66.7</b> | <b>78.3</b> | <b>67</b> |

Table 10. **Comprehensive evaluation** of instance segmentation on ObjectNet3D. We report the IoU for 20 categories.

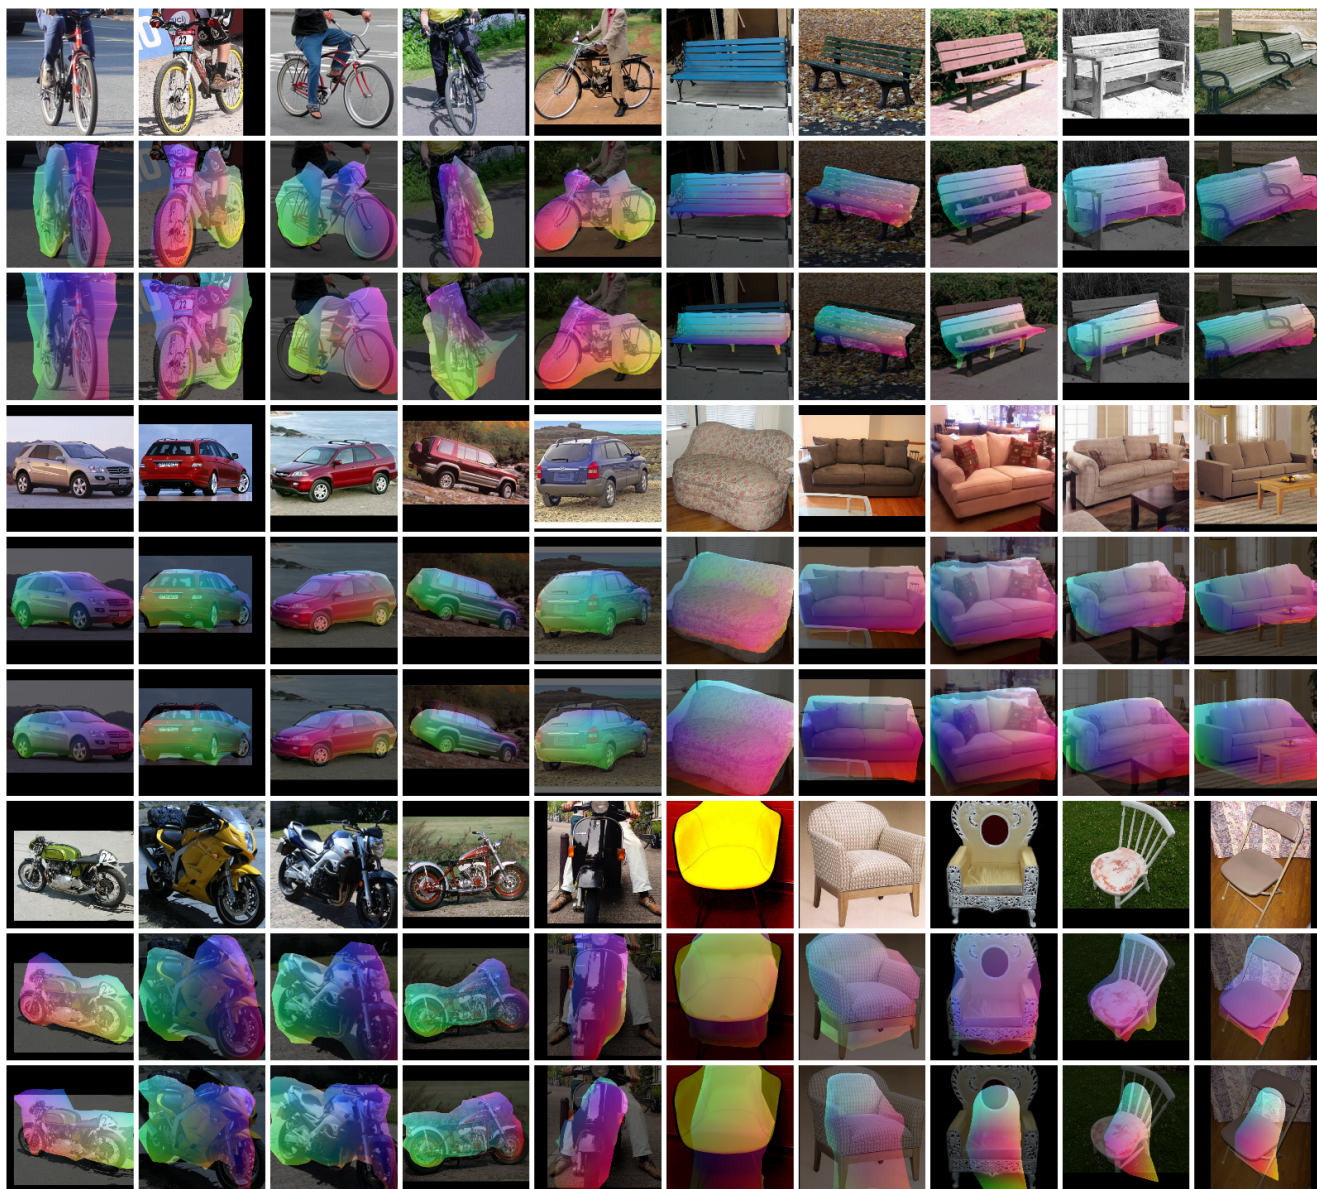

Figure 4. **Comprehensive qualitative results** on the ObjectNet3D dataset. In the second row the results of our method are illustrated, in the third the results of UOP3D [52]. Notably, our method fits the object more accurately, resulting in improved 3D pose and segmentation accuracy.



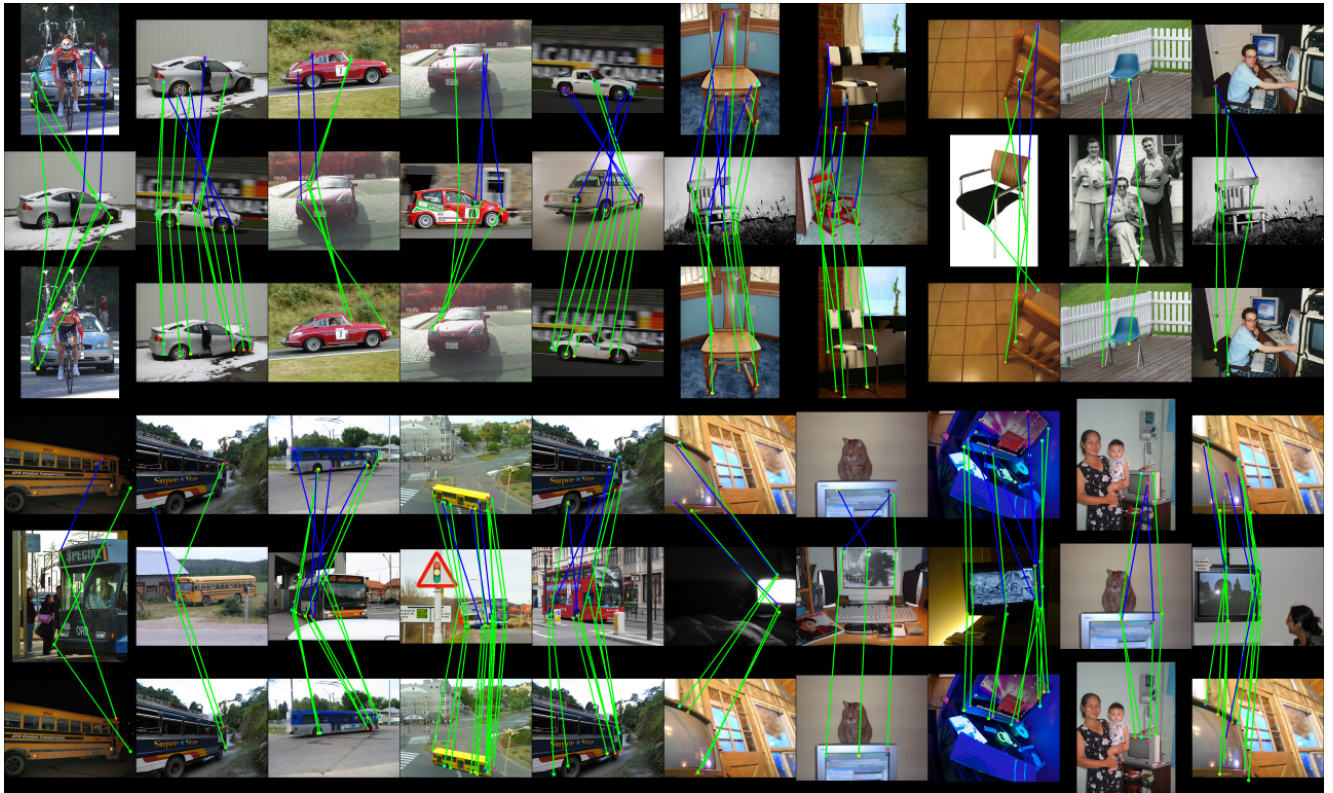

Figure 5. **Comprehensive qualitative results** on the SPair-71k dataset. In the first row the results of DINOv2 are illustrated, in the third the results of our method. Our method can improve DINOv2 correspondences by resolving ambiguities in parts and symmetries.

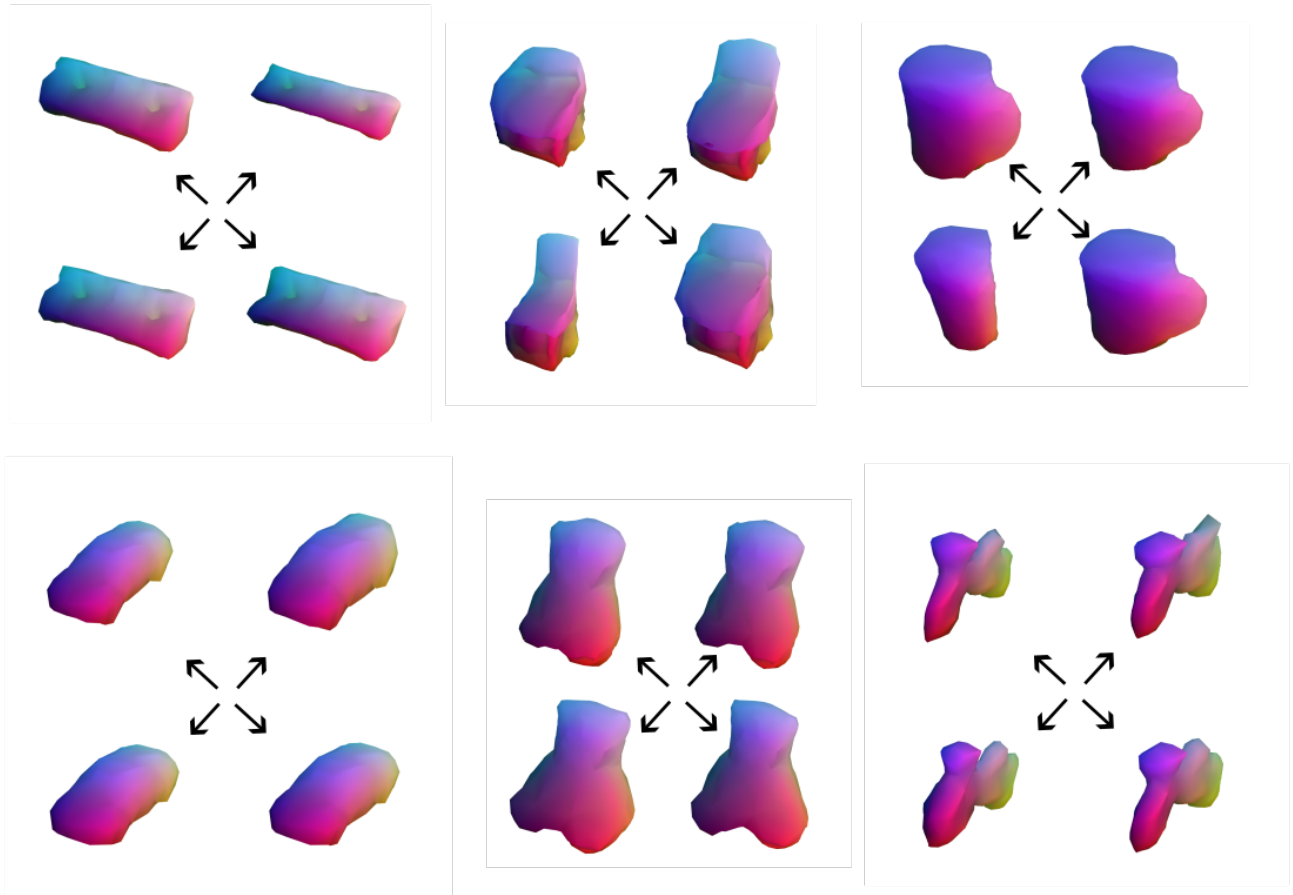

Figure 6. **3D morphable models with their latent deformations.**
